# Phase precession in the human hippocampus and entorhinal cortex

Salman E. Qasim<sup>1</sup>, Itzhak Fried<sup>2</sup>, and Joshua Jacobs<sup>1</sup>

<sup>1</sup>Department of Biomedical Engineering, Columbia University, New York, NY 10027

<sup>2</sup>Department of Neurological Surgery, University of California, Los Angeles, Los Angeles, CA 90095

Keywords:

Hippocampus, phase precession, entorhinal cortex, theta oscillation, place cells.

Address correspondence to:

Joshua Jacobs  
351 Engineering Terrace  
Mail Code 8904  
1210 Amsterdam Avenue  
New York, NY 10027  
Phone: 212-854-2445  
e-mail: [joshua.jacobs@columbia.edu](mailto:joshua.jacobs@columbia.edu)

## Abstract

1       Knowing where we are, where we have been, and where we are going is critical to many behaviors, including  
2       navigation and memory. One potential neuronal mechanism underlying this ability is phase precession, in which  
3       spatially tuned neurons represent sequences of positions by activating at progressively earlier phases of local  
4       network theta (~5–10 Hz) oscillations. Phase precession may be a general neural pattern for representing sequential  
5       events for learning and memory. However, phase precession has never been observed in humans. By recording  
6       human single-neuron activity during spatial navigation, we show that spatially tuned neurons in the human  
7       hippocampus and entorhinal cortex exhibit phase precession. Furthermore, beyond the neural representation  
8       of locations, we show evidence for phase precession related to specific goal-states. Our findings thus extend  
9       theta phase precession to humans and suggest that this phenomenon has a broad functional role for the neural  
10      representation of both spatial and non-spatial information.

## 11 Introduction

12 Our brain's ability to link related experiences is critical to everyday life, and to our memory for past experiences.  
13 One crucial example is spatial navigation, which requires awareness of individual locations and the association  
14 between multiple locations, such as those on the same path. Similarly, episodic memory requires the encoding of  
15 individual events and the association between sequential events. The hippocampal formation is important for both  
16 spatial cognition and episodic memory<sup>1-4</sup>. Therefore, neural activity in this region might play a key role in linking  
17 sequential locations and events.

18 Specifically, theories of how the brain represents sequential experiences rely on the idea that the timing of neuronal  
19 spiking is critical for learning associations<sup>5-10</sup>. Spike timing, in turn, is thought to be coordinated across networks  
20 by fluctuations in the large-scale network activity that can be estimated via the local field potential (LFP)<sup>11-16</sup>. This  
21 suggests that a coordinated relationship between network oscillations and single-cell spiking may play a mechanistic  
22 role in complex behaviors or aspects of cognition, such as memory<sup>17,18</sup>, that require the association of sequential  
23 events. A prominent potential mechanism for the binding and compressing of sequential events is hippocampal phase  
24 precession, extensively observed in rodents, during which active neurons rhythmically spike in coordination with the  
25 local theta frequency (5–10 Hz) oscillation. Phase precession is readily observable in many hippocampal place cells<sup>19</sup>  
26 and entorhinal grid cells<sup>20,21</sup>. Because these neurons spike slightly faster than the theta oscillation as the rodent runs  
27 through specific locations, phase precession results in sequences of locations being encoded at different phases of  
28 theta oscillations. As such, phase precession may compress spatial trajectories on the scale of behavior into the brief  
29 timescale of the theta cycle that is conducive to synaptic plasticity<sup>22-24</sup>.

30 There is evidence that phase precession's utility for binding and compressing sequential events may be used  
31 by the brain to represent non-spatial features of experience as well. While phase precession is often described in  
32 hippocampal place cells or entorhinal grid cells, it has also been observed in a diverse range of brain areas such  
33 as ventral striatum<sup>25</sup>, subiculum<sup>26</sup>, basal forebrain<sup>27</sup>, and medial prefrontal cortex<sup>28</sup>. Critically, a slew of recent  
34 work has directly observed phase precession independent of location within a place or grid field, encoding elapsed  
35 time during REM sleep<sup>29</sup>, wheel-running<sup>30</sup>, jumping<sup>31</sup>, fixation<sup>32</sup>, presentation of task-relevant stimuli<sup>33-35</sup>, and task  
36 epoch<sup>27</sup>. The widespread prevalence of phase precession suggests that this phenomenon has a more general role  
37 beyond representing the current spatial location, and that it could be relevant for building neural representations in  
38 many regions to support diverse aspects of cognition, learning, and memory.

39 Despite its prevalence in rodents, and the many theories suggesting a fundamental role for phase precession  
40 in neural coding<sup>19,36-38</sup>, phase precession has not been observed in humans. To examine this issue, we analyzed  
41 simultaneous single-neuron and LFP activity from neurosurgical patients as they performed a virtual spatial memory  
42 task and examined the patterns of spike–LFP interaction. Here, we describe spatial phase precession in humans  
43 analogous to that observed in navigating rodents. We also describe evidence for phase precession related to the coding  
44 of non-spatial variables, in which neurons transiently spike faster than the theta oscillation during trajectories to  
45 specific goals. Overall, our findings extend precession to humans and demonstrate its potential use for encoding both  
46 spatial and non-spatial features of experience.

## 47 Results

48 **Spatial phase precession in hippocampus and entorhinal cortex during navigation.** We analyzed recordings  
49 of neuronal spiking from 1,074 neurons in the hippocampus, entorhinal cortex, parahippocampal gyrus, anterior  
50 cingulate cortex, and amygdala of 13 neurosurgical patients undergoing clinical treatment for drug-resistant epilepsy.  
51 During recordings, subjects performed a goal-directed navigation task in a 2D virtual environment on a laptop  
52 computer<sup>39,40</sup> (Supplementary Fig. 1; see *Methods*). The virtual environment contained six goal stores surrounding  
53 the perimeter of a square track, with the center of the environment obstructed by buildings. Subjects were able to  
54 travel around the track in either clockwise or counterclockwise directions (Fig. 1A).

55 Given our interest in phase coding, we first characterized the prevalence of theta oscillations in the human  
56 hippocampus and compared their properties to those seen in rodents, leveraging a publicly-available dataset<sup>42</sup>.

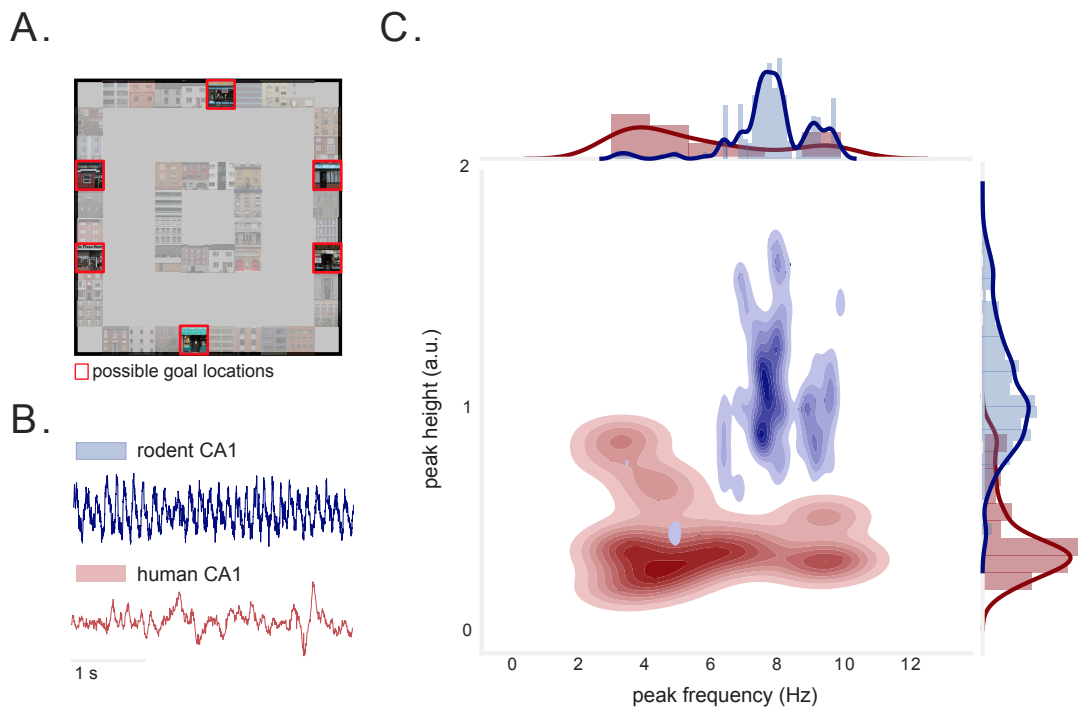

**Figure 1: Virtual environment and hippocampal theta oscillations during task.** A) Overhead view of task environment. Red squares denote locations of possible goal locations. B) Examples of raw LFP data from rodent (publicly available dataset<sup>41</sup>) and human hippocampus. C) Joint distribution of peak frequency and peak height of LFP power spectral density (PSD) from rodent (blue) and human (red) hippocampus. Rodent hippocampal recordings exhibit highly stereotyped peaks. Human hippocampal recordings exhibit significantly smaller peak heights, and peaks are at significantly lower frequencies ( $p$ 's  $< 2 \times 10^{-34}$ , Wilcoxon rank-sum tests).

57 Compared to rodents, human hippocampal theta spanned a significantly broader range of frequencies ( $p < 4 \times 10^{-4}$ ,  
58 Levene test), with significantly smaller, lower-frequency peaks in the power spectrum ( $p$ 's  $< 3 \times 10^{-8}$ , Wilcoxon  
59 rank-sum tests; Figs. 1B-C, S2). Because human theta appears to span both low and high frequencies<sup>43</sup>, we assessed  
60 phase precession with respect to oscillations at a broad range of LFP theta frequencies (2–10 Hz) (Fig. 1C). To assess  
61 phase precession we first identified each neuron whose firing was modulated by the subject's position in the virtual  
62 environment. We labelled the clockwise (CW) and counter-clockwise (CCW) movement periods and then used a  
63 shuffle-corrected ANOVA to identify 292 spatially modulated neurons that fired significantly more when subjects  
64 moved through particular locations during one or both of these movement conditions<sup>44</sup>, after correcting for multiple  
65 comparisons (see *Methods*). Because phase precession in rodents is most predominant near the place-field center<sup>45</sup>  
66 and on short trajectories<sup>46</sup>, we tested for phase precession during short trajectories through the field center, defined as  
67 the peak firing location for each neuron (Fig. 2A).

68 We observed that some of the spatially tuned neurons showed spiking at progressively earlier phases of the theta  
69 oscillation during individual trajectories through their firing field (Supplementary Fig. 3). To assess if this was a  
70 consistent pattern across trajectories, we leveraged the fact that during phase precession, spikes at later positions in  
71 the trajectory should occur at earlier phases, manifesting as a negative correlation between spike-phase and position<sup>19</sup>.  
72 In this way, spiking at different phases of the LFP would correspond to different relative positions along the path to a  
73 neuron's firing field center (Fig. 2B,C). We tested for this pattern by measuring the correlation<sup>47</sup> between spike-phase  
74 and position using circular statistics<sup>48</sup> and a shuffle-based permutation procedure (see *Methods*).

75 By performing this procedure across all of the spatially-tuned neurons we identified, we report the first evidence  
76 of phase precession in humans. Figure 2D shows three examples of single neurons recorded in the hippocampus  
77 and entorhinal cortex that exhibited significant phase precession during navigation at particular spatial locations (see  
78 Supplementary Fig. 4 for additional examples). Each of these neurons increased their firing in a specific region of  
79 the environment (Fig. 2D, left). As a person approached the center of that region, the neuron initially spiked at late

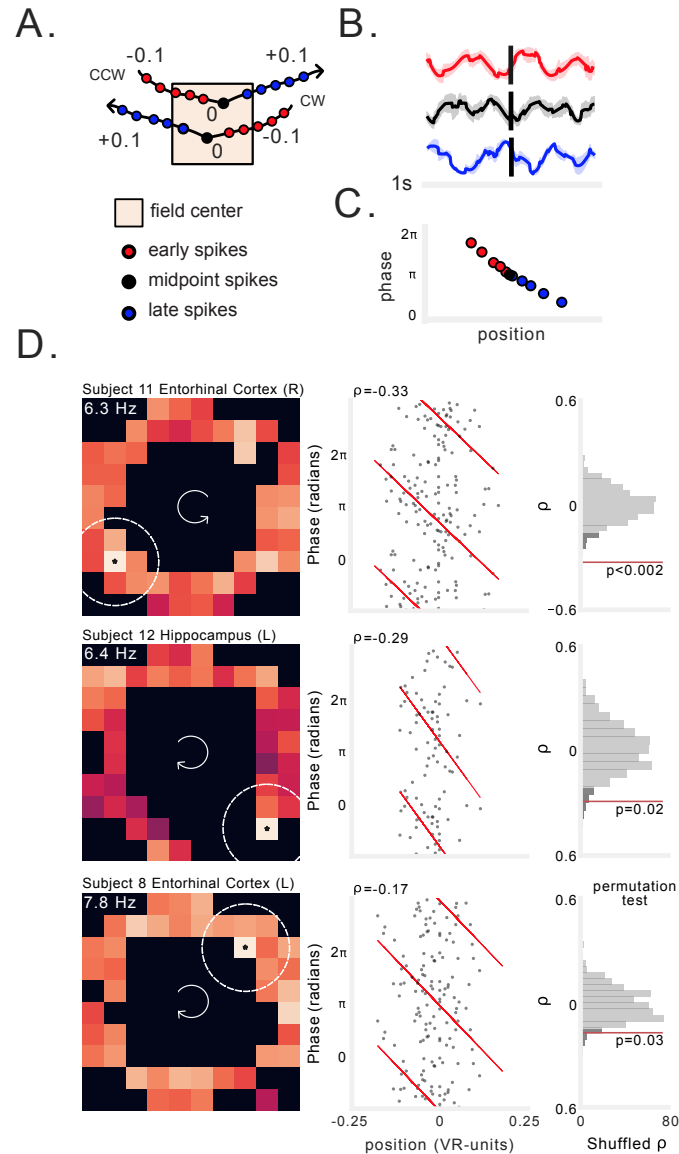

**Figure 2: Examples of spatial phase precession in human hippocampus and entorhinal cortex.** A) Schematic illustrating our method for selecting spikes near peak firing bin (*see Methods*). For each spatially modulated cell we analyzed phase precession using spikes that occurred early (red), at the midpoint (black), and late (blue) in trajectories through the center of the firing field. B) Spike-triggered average (STA) LFP (reconstructed from phase) for early, midpoint, and late trajectory spikes from one neuron. C) Schematic of spike phase as a function of distance from center spike during a trajectory through the field, showing phase precession as a negative progression of phase-by-position. D) Three examples of spatial phase precession. Each row shows an individual neuron. Left: firing rate heat map. Text label indicates average firing rate in peak firing bin, which is noted with an asterisk. Brighter colors denote higher firing rates. Dotted lines indicate maximum radius around field in which spiking was assessed. Arrows in the center of the heatmap indicate the movement direction. Middle: spike phase as a function of location relative to the field center. Spike phases are duplicated vertically to enable visualization of circular-linear regression. Rho indicates circular-linear regression coefficient. Right: statistical assessment of circular-linear regression rho using surrogate distribution of circular-linear regression rho values generated by permutation of spike phases. Red line indicates value of real data. Dark gray shading indicates 95<sup>th</sup> percentile of surrogate distribution.

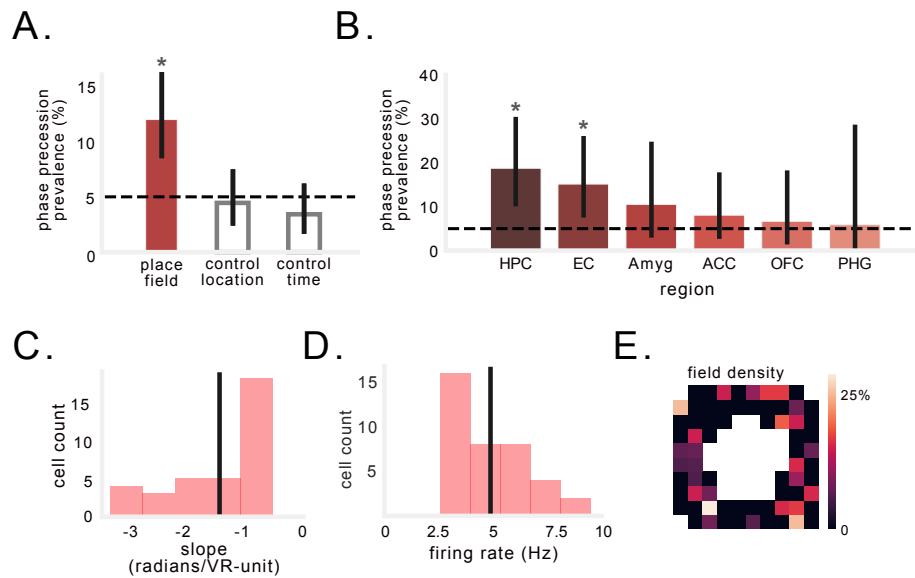

**Figure 3: Prevalence and characteristics of spatial phase precession in humans.** A) Percentage of spatially modulated cells that exhibit phase precession during trajectories through the firing field (filled bar). Grey bars show control analyses of precession relative to alternative locations, or as a function of time, not position, during spiking episodes (see Supplementary Fig. 5). Black dotted line denotes chance. Solid black line indicates 95% binomial confidence interval. Asterisk indicates significant proportion of spatially modulated cells exhibiting phase precession during trajectories through the firing field ( $p < 3 \times 10^{-6}$ , binomial test). B) Percentage of spatially modulated cells across regions. Asterisk indicates significant proportion of cells exhibit phase precession ( $p < 0.002$ , binomial test). C) Distribution of circular-linear regression slopes identified for neurons exhibiting significant phase precession. Black line indicates mean. D) Distribution of average firing rate of peak firing bins in which phase precession was observed. E) Prevalence of phase precession across the environment. Colors indicate percentage of firing fields in each bin that exhibited precession.

80 phases of the 2–10 Hz LFP, but as they continued their trajectory through the center and past it, spikes occurred at  
 81 progressively earlier phases (Fig. 2D, middle). This change in spike phases between early positions and late positions  
 82 is characterized by significant negative phase–position correlations (Fig. 2D, right).

83 After testing the spatially-tuned neurons in our dataset for phase precession with our permutation procedure, we  
 84 found that precession was widespread, with 12% (35/292) of neurons exhibiting this phenomenon, which is well  
 85 above what would be observed by chance ( $p < 3 \times 10^{-6}$ , binomial test; Fig. 3A). Of these 35 neurons, 22 neurons  
 86 exhibited uni-directional spatial tuning and precession and 10 neurons exhibited bi-directional spatial tuning and  
 87 precession. The remaining 3 neurons exhibited uni-directional precession in one location and bi-directional precession  
 88 in another. Notably, we specifically observed significant proportions of spatially modulated cells exhibiting spatial  
 89 phase precession in the hippocampus and entorhinal cortex ( $p$ 's < 0.002, binomial test; Fig. 3B). Phase precessing  
 90 neurons exhibited an average circular–linear correlation coefficient of  $-0.26 \pm 0.09$ , an average slope of  $-1.36 \pm 0.8$   
 91 radians/VR-units (Fig. 3C), and an average in-field firing rate of  $4.9 \pm 1.7$  Hz (Fig. 3D). Phase precessing neurons had  
 92 spatial firing fields throughout the environment (Fig. 3E). To test whether spatial phase precession was consistent  
 93 across an entire behavioral session, we separately computed the circular–linear correlation coefficient for the first  
 94 and second halves of the session and found no difference between halves ( $p = 0.4$ , paired t-test), with significantly  
 95 negative correlation coefficients in each half ( $p$ 's < 0.002, one-sample t-test). We found evidence for spatial phase  
 96 precession in 11/12 of the subjects with spatially modulated neurons. These results thus demonstrate the existence  
 97 of phase precession as a neural code for spatial position in humans during virtual navigation. The theta-frequency  
 98 (2–10 Hz) and regions involved (hippocampus, entorhinal cortex) suggest that the phase precession we observed is  
 99 largely analogous to that documented in rodent place and grid cells.

100 To be sure that our findings of precession indicated a spatial phase code relative to space, we tested two alternative  
 101 explanations for our results: that precession was equally prevalent at randomly selected spatial locations (in which the  
 102 neuron was sufficiently active), or that precession was actually measuring the advance of spike phase according to

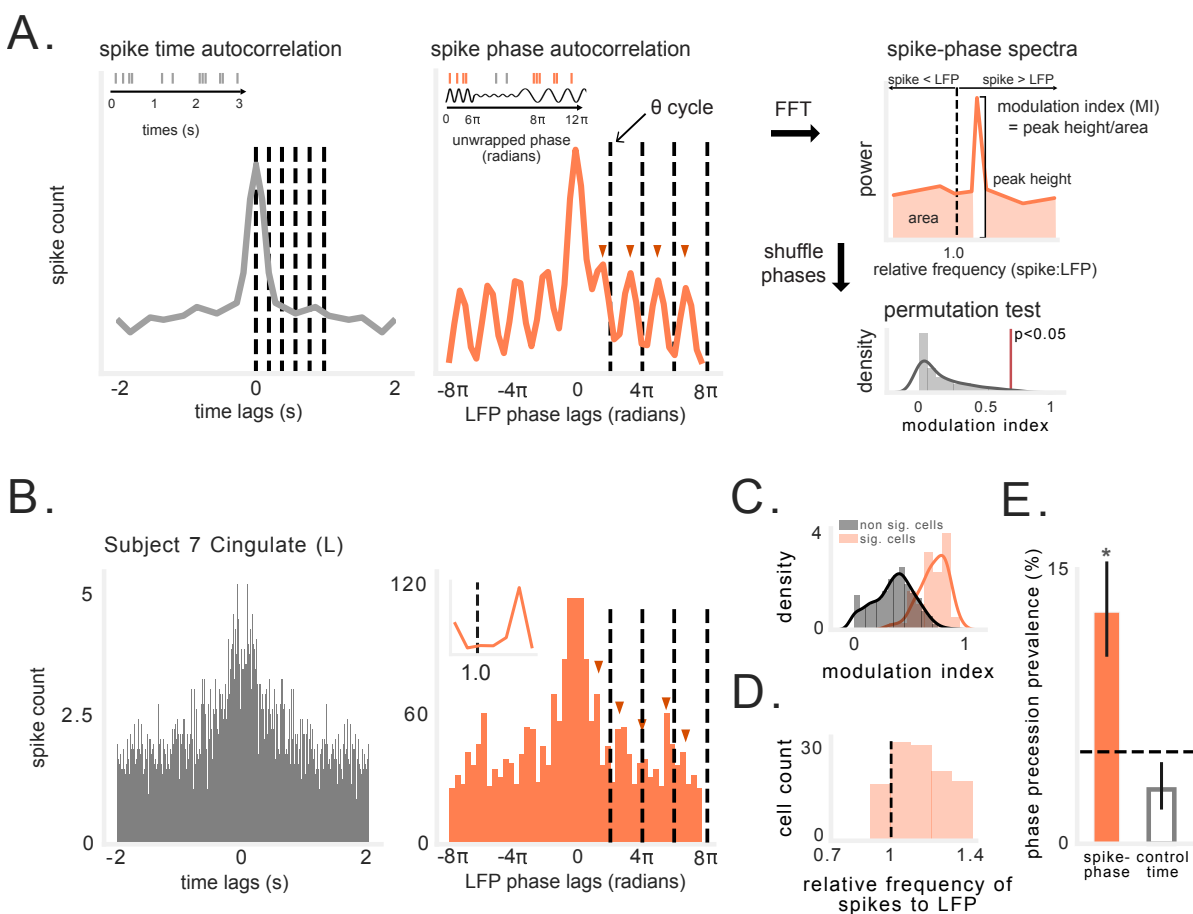

**Figure 4: Spike-phase spectra reveals precession-like pattern in non-spatially tuned neurons.** A) Schematic illustrating analysis of rhythmic spiking frequency relative to LFP oscillation (*see Methods*). Left: Autocorrelation of spike times (gray), with dotted lines at 200 ms intervals. Middle: Autocorrelation of unwrapped spike phases. Dotted lines indicate one cycle of ongoing LFP in 2–10 Hz band. Red arrows indicate peaks in autocorrelation, which occur progressively earlier than cycles of ongoing LFP. Fast Right: Fourier transform (FFT) of autocorrelation function yields power spectral density (PSD) showing cell spiking frequency relative to ongoing LFP frequency. The modulation index (MI) is visualized here as the ratio of the spectral peak height to power at all other relative frequencies. This value is compared to a null distribution of MI values generated by shuffling spike phases in each cycle. B) Left: Spike time autocorrelation showing little evidence of theta modulation. Right: Spike phase autocorrelation (orange) showing cell oscillating slightly faster than ongoing LFP (cycles of 2–10 Hz LFP indicated by dotted line). Inset shows spike-phase spectra. C) Modulation index (MI) of spike-phase spectral peaks for significant vs. non-significant neurons. D) Distribution of relative frequencies for neurons exhibiting significant MI. Values to the right of the black line indicate that the rhythmic spiking frequency slightly exceeded the LFP frequency. E) Percentage of non-spatial cells that exhibit precession-like spiking relative to LFP phase, compared to cell's exhibiting precession relative to time in a spiking episode. Black dotted line denotes chance level. Solid black line indicates 95% binomial confidence interval. Asterisk indicates significant proportion of cells ( $p < 7 \times 10^{-18}$ , binomial test).



103 elapsed time (see *Methods*; Supplementary Fig. 5A, C). Neither alternative model identified significant proportions of  
104 phase-precessing cells, and these models resulted in the identification of a smaller number of cells as compared to our  
105 primary analyses ( $\chi^2 = 20.6$ ,  $p < 4 \times 10^{-5}$ , chi-squared test; Fig. 3A; see also Supplementary Fig. 5B, D). These  
106 results indicate that human phase precession occurs more strongly at locations that show the highest firing rates, and  
107 that phase precession in spatially tuned neurons is more closely tied to location than elapsed time during movement.

108 **Evidence for phase precession without spatial coding.** While phase precession has been observed most readily  
109 relative to specific spatial locations, there is also evidence for precession with respect to non-spatial behaviors  
110 and stimuli<sup>27,29–31,33</sup>, and in regions outside the hippocampal formation<sup>25,28</sup>. These findings suggest that phase  
111 precession could be a more general phenomenon that the brain uses to represent diverse types of consecutive, relevant  
112 stimuli/states using different phases of an oscillation. To examine this possibility, we used a broader analytical method  
113 to test whether the non-spatially tuned neurons exhibited phase precession without reference to position. To do this,  
114 we measured each neuron's rhythmic frequency of spiking in comparison to the local theta oscillation<sup>49,50</sup>. Identifying  
115 a consistent pattern of faster-than-LFP rhythmic spiking would indicate the presence of a precession-like pattern of  
116 LFP-coordinated spiking that could bind and compress sequential, non-spatial features of the task — just as spatial  
117 phase precession is theorized to do for locations<sup>24,51</sup>.

118 We identified neurons that showed rhythmic spiking at a frequency faster than the theta oscillation by using a  
119 method that has identified this pattern in animals with very stereotyped, 8 Hz theta such as rats<sup>26,42,52</sup> and mice<sup>53,54</sup>,  
120 as well as animals with human-like theta that appears at a range of frequencies, such as bats<sup>55</sup>. In brief, in this method  
121 we first measured the theta phase estimate for each spike from the concurrent 2–10 Hz LFP and “unwrapped” the  
122 phase time series so that it increased linearly, like elapsed time. We then measured the spike-phase spectrum, which  
123 we defined as the power spectral density of the time series of unwrapped spike phases (see *Methods*). In contrast  
124 to conventional spectral analysis that measures the frequency of a signal relative to absolute time, the spike-phase  
125 spectra reflects the relative frequency of rhythmic spiking compared to the frequency of concurrent LFP oscillations.  
126 If a spike-phase spectra showed a peak at a relative frequency  $> 1.0$  it would indicate that a neuron's rhythmic spiking  
127 was faster than the concurrent oscillations in the LFP, and thus this neuron's spiking exhibited precession relative  
128 to the LFP (Fig. 4A). This method ensures that a consistent relationship between the spiking frequency and LFP  
129 frequency can be identified even if the LFP shifts in frequency or amplitude, and even though neuronal spike times  
130 alone may not show a clear oscillation (Supplementary Fig. 6), as is the case in humans and bats<sup>55</sup>. We validated this  
131 method by applying it to data from rodent CA1 and identifying a consistent  $> 1.0$  relative frequency (Supplementary  
132 Fig. 7), consistent with the spatial phase precession observed in these neurons<sup>42</sup>.

133 To assess whether precession-like rhythmic spiking was evident for non-spatially tuned cells, we applied this  
134 method to the 744 neurons that were active during the task but did not exhibit significant spatial tuning. Figure 4B  
135 depicts an example neuron that we identified with this method that showed significant precession. This analysis found  
136 that the rhythmicity of this cell's spiking frequency occurred at a frequency that reliably exceeded the frequency of  
137 the LFP (right panel), although no consistent rhythm is apparent from the spike timing alone (left panel). Using  
138 this method we found that 12% of non-spatially tuned neurons (90/744) showed a significant relationship between  
139 neuronal spiking frequency and LFP frequency (Fig. 4C), at a range of relative frequencies  $> 1.0$  (Fig. 4D). The  
140 number of neurons that showed this phenomenon was significantly more than we expected by chance ( $p < 7 \times 10^{-18}$ ,  
141 binomial test; Fig. 4E).

142 We performed a control analysis (Supplementary Fig. 5C) to rule out the possibility that these effects could be  
143 explained by the absolute spike timing, though this was unlikely given the relative lack of intrinsic rhythmicity in the  
144 spike timing (see Supplementary Fig. 6). This analysis confirmed that most of these neurons show phase precession  
145 only when spiking is measured relative to the instantaneous ongoing oscillation rather than absolute time<sup>56</sup> (Fig.  
146 4E). These results illustrate how the frequency variability of human hippocampal theta<sup>43</sup> may diminish traditional  
147 measures of phase precession, and demonstrate the potential for phase precession in neurons that are not spatially  
148 tuned. We next sought to test whether this new non-spatial precession pattern might vary behaviorally in relation to  
149 non-spatial, higher level features of the task, such as prospective goals.



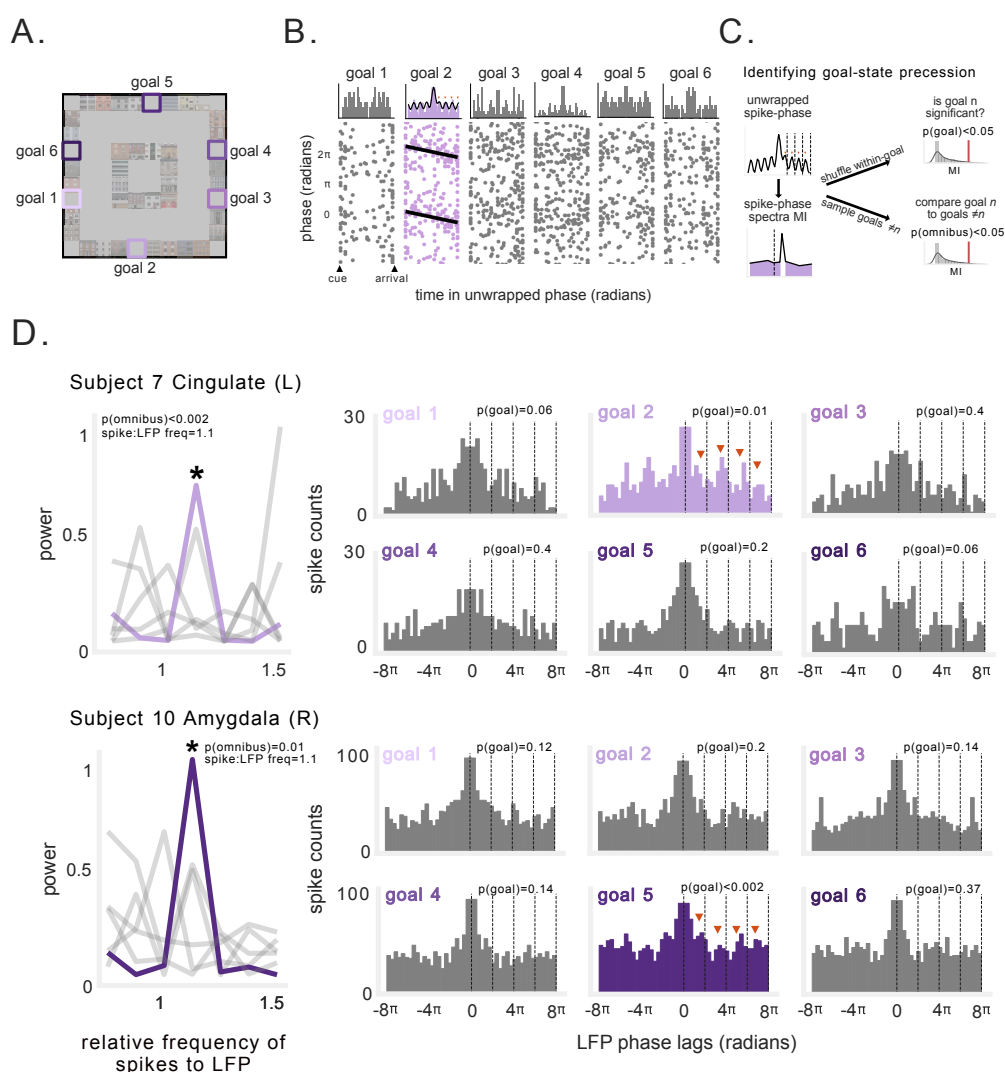

**Figure 5: Goal-state phase precession.** A) Schematic of task environment. Labels indicate goal locations. B) Spike-phases during navigation to different goals for example neuron. Top: unwrapped spike-phase autocorrelograms for each goal. Black line indicates fit of decaying-oscillation function. Spiking frequency transiently exceeded LFP frequency only during navigation to goal 2. Bottom: Spike-phase as a function of duration within each goal epoch. Black line indicates circular-linear regression fit. C) Schematic of method for assessing goal-state phase precession. If a neuron exhibited a significant spike-phase spectral peak at relative frequency exceeding 1 (following multiple comparisons correction), and this effect was significantly stronger than that observed during trajectories to other goals, then this neuron was classified as exhibiting goal-state precession (*see Methods*). D) Example neurons exhibiting phase precession during navigation to specific goals. Left: Spike-phase spectra depicting frequency of neuronal spiking relative to ongoing LFP. Asterisk denotes spectral peaks that were significant and significantly different from other spike-phase spectra for other goals. Gray lines denote non-significant goals. Right: Spike-phase autocorrelograms during navigation to each goal (significant goal epochs depicted in color). Text indicates the p-value for significance tests described in C).

150 **Evidence for phase precession during trajectories to specific goals.** Having shown that non-spatially tuned  
151 neurons can exhibit phase precession, we next tested whether this was a tonic pattern<sup>50</sup> or, alternatively, one that  
152 emerged selectively to code for specific stimuli or states. Specifically, recent work has shown that human hippocampal-  
153 cortical networks represent goals and their intermediate locations<sup>57</sup>; furthermore we found previously that this task  
154 elicits distinctive patterns of rate- and phase- coding for goals<sup>58</sup>. Therefore, we assessed whether phase precession  
155 emerged selectively during trajectories to specific goals in service of binding those trajectories for learning and  
156 memory.

157 During each trial of this task, the subject was cued to travel to a randomly selected goal location (Fig. 5A). We  
158 found that some neurons specifically showed phase precession only during travel to particular goals. Figure 5B  
159 shows an example of a neuron whose spiking shows phase precession during navigation to goal 2, but not the other  
160 goals. This effect is evident in the spike-phase autocorrelogram for that goal, which shows that during travel to goal 2  
161 rhythmic spiking occurs at a frequency that is slightly faster than the ongoing 2–10 Hz LFP. To systematically test for  
162 goal-state phase precession, we measured the spike-phase spectrum during trajectories to each goal and compared  
163 these spectra between goals, using a permutation procedure and correcting for multiple comparison across goals (Fig.  
164 5C, see *Methods*). Figure 5D depicts two example neurons from the hippocampus and amygdala of two different  
165 subjects (see Supplementary Fig. 8 for additional examples). These neurons exhibited rhythmic spiking at faster  
166 frequencies than the ongoing LFP while the subjects were en route to specific goals. Critically, this rhythmic spiking  
167 was goal-specific and did not appear during trajectories to other goals. These patterns were thus examples of phase  
168 precession for a particular goal-state, similar to phase precession in a place field.

169 We applied this method to the 448 non-spatially tuned neurons that were sufficiently active during each goal,  
170 and found a population of neurons exhibiting a significant pattern of faster-than-LFP rhythmic spiking during at  
171 least one goal (Fig. 6A), across a range of relative frequencies (Fig. 6B). Overall, 11% of these neurons (49/448)  
172 exhibited significant goal-state precession. We found at least one neuron exhibiting goal-state phase precession in  
173 10/13 subjects. Of the neurons exhibiting goal-state precession, almost all did so for only one of the six goals (Fig. 6C).  
174 This effect was present at significant levels in anterior cingulate, orbitofrontal cortex, amygdala, and hippocampus,  
175 but not parahippocampal gyrus or entorhinal cortex ( $p$ 's < 0.02, binomial test; Fig. 6D).

176 We performed a series of control analyses that rules out the possibility that our observation of precession for  
177 specific goal states was confounded by between-goal differences in LFP power or neuronal firing rate (Fig. 6E).  
178 Indeed, neither example neuron in Figure 5 exhibited increased firing rates during goals that showed precession,  
179 suggesting that goal-state precession was independent of goal-specific firing rate increases<sup>58</sup>. Overall, only 17 of  
180 the 49 neurons that showed goal-state precession also showed increased goal-specific firing rate increases ( $ps$  < 0.05,  
181 one-way ANOVA), and only 2 of 17 of these neurons showed precession and a firing rate increase for the same goal<sup>35</sup>  
182 (Fig. 6F). Next, we tested whether subject performance on different goals might be responsible for our results, i.e.,  
183 whether precession might occur when subjects perform more efficient navigation. We measured subject's performance  
184 on each goal (see *Methods*) and found no significant difference in navigational performance between goals that elicited  
185 precession and those that did not (Supplementary Fig. 9A, B). Because differences in theta power, firing rate, and  
186 behavior did not account for our results, our findings indicate that non-spatial phase precession selectively occurs  
187 during trajectories to specific goals and may also support the representation of non-spatial, sequential features of  
188 behavior.

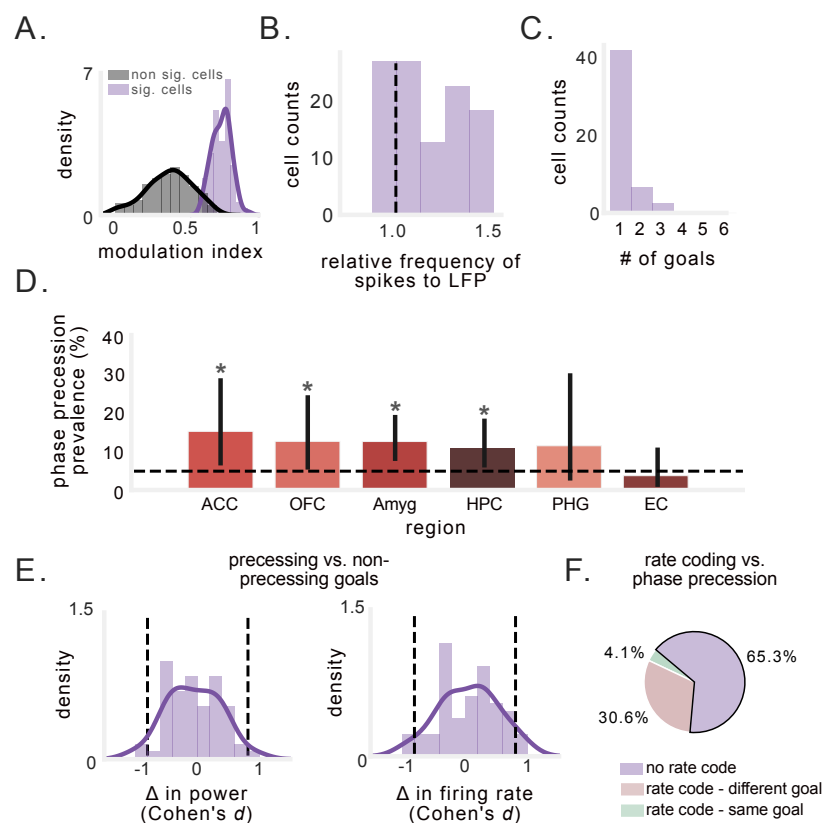

**Figure 6: Prevalence and characteristics of goal-state phase precession in neurons that are not spatially tuned.** A) Modulation index (MI) of spike-phase spectral peaks for significant vs. non-significant goals. B) Peak spike-phase PSD frequency for all goals for which a neuron exhibited a significant MI in the spike-phase spectra. Values to the right of the black line indicate that the neuronal frequency slightly exceeded the LFP frequency, indicating precession. C) Number of goals per neuron for which precession was observed. Most neurons exhibited precession during only one goal. D) Percentage of non-spatial cells in each region that exhibited goal-state phase precession. Asterisks indicate significant proportion of cells ( $p < 0.02$ , binomial test). E) Distribution of Cohen's  $d$  for the difference in 2–10 Hz power (left) and firing rate (right) between trajectories to goals showing precession vs. those that did not. Black dotted line indicate effect size of  $\pm 0.8$ . F) Analysis of overlap between goal-state phase precession and rate coding for goals.

## 189 Discussion

190 The nature of the neural code is a fundamental question in neuroscience. Our findings show the first evidence that  
 191 neurons in the human brain spike in rhythm with local network oscillations to represent spatial position and non-spatial  
 192 events, in addition to the well-established code based on firing rate. Specifically, we demonstrate the existence of  
 193 phase precession in humans during a virtual spatial memory task. We provide evidence for rodent-like spatial phase  
 194 precession in human hippocampus and entorhinal cortex, in which spatially tuned neurons spike at earlier phases of  
 195 theta (2–10 Hz) LFP oscillations as subjects moved through the putative place field center. We also provide evidence  
 196 for the existence of non-spatial, goal-state phase precession which occurs transiently during trajectories to specific  
 197 goals. These findings thus extend phase precession beyond rodents, and beyond spatial location, highlighting its  
 198 potential as a more widespread neuronal mechanism for coordinating spike timing during behavior and cognition.

199 The spatial phase precession we observed bears important similarities to phase precession in rodents. We found  
 200 spatial phase precession most predominantly in hippocampus and entorhinal cortex, where place and grid cells,  
 201 respectively, are canonically found<sup>2,59–61</sup>. This suggests that the spatial phase precession we observed may be driven  
 202 primarily by place- and grid- cells, as it is in rodents. One potential reason why phase precession has not previously  
 203 been observed in humans is because human theta oscillations often appear at a slower and broader range of frequencies  
 204 compared to those seen in rodents<sup>43,62,63</sup>. We specifically assessed phase precession relative to the broader range of  
 205 theta frequency (2–10 Hz) fluctuations of the LFP, in line with the recent discoveries of phase precession in bats<sup>55</sup>

206 and marmosets<sup>64</sup> — two animals with similarly heterogeneous theta oscillations. Our findings are also consistent  
207 with findings from rodents, who continue to show phase precession even when LFP theta power and theta-modulated  
208 spiking are reduced<sup>25,65,66</sup>. Furthermore, phase coding may not depend on regular, high amplitude rhythmicity in  
209 neural activity<sup>51</sup>. Instead, shifting LFP frequency can modulate spike-time intervals for synaptic plasticity without  
210 affecting the spike-phase<sup>51</sup>. Recent work in rodents has indeed demonstrated that the theta phase code is robust to  
211 changes in theta frequency, even as temporal lags between spikes are altered<sup>56</sup>. It is thus likely that the spatial phase  
212 precession we observed is analogous to that described in rodents, despite differences in theta range and rhythmicity.

213 Phase precession has predominantly been observed during place- or grid- cell spiking<sup>67</sup>. However, recent work has  
214 discovered the presence of phase precession relative to sound<sup>33,34</sup>, odor<sup>34</sup>, time in an episode<sup>29–31</sup>, task progression<sup>27</sup>,  
215 and REM sleep<sup>29</sup>. These findings highlight the potential generalizability of phase precession to non-spatial domains.  
216 In these instances, phase precession may enable the encoding of any successive stimuli or state, with the progression of  
217 phases binding a myriad of non-spatial sequences together for learning. By leveraging the idea that any variable may  
218 be encoded in spike phase if the frequency of spike rhythmicity exceeds the frequency of the local LFP oscillation<sup>42,51</sup>,  
219 we showed that phase precession also occurs with respect to behavioral states other than inhabiting a specific physical  
220 location—in this case, exclusively during trajectories to specific goals. The fact that this result is so specific, only  
221 showing up for a subset of goals for each neuron, might suggest an ensemble temporal code responsible for encoding  
222 all of the goals in the task<sup>68,69</sup>.

223 The goal-state phase precession we observed was largely independent of rate coding for goals, which has been  
224 described previously in human studies<sup>58,60,70</sup>. That the presence of rate and phase coding for goals is statistically  
225 independent is consistent with observations in rodents that showed that phase precession can appear for specific  
226 behavioral states even in the absence of concurrent firing-rate changes<sup>35</sup>. These findings support the theory that phase  
227 precession is used by the brain to signal behavioral states independent of firing-rate changes<sup>71,72</sup>. A challenge for  
228 future work is to understand the specific features of this phenomenon, such as the role of different phases within  
229 goal-state precession. One hypothesis is that goal-state precession may help track a person’s “episodic” position  
230 within a goal-seeking event. This would align with work in rodents showing phase-precession in “episode” or “time”  
231 cells when a rodent runs on a treadmill with a goal<sup>30</sup> but not without a goal<sup>73</sup>, as well as evidence from human imaging  
232 showing that hippocampal and entorhinal cortex population activity correlates with distance to goal<sup>74</sup>. Furthermore,  
233 goal-state phase precession may relate to the phase precession observed in ventral striatum “ramp cells”<sup>25</sup>, and medial  
234 prefrontal cortex neurons in rodents<sup>28</sup>. The former exhibited precession as rodents approached reward locations, and  
235 the latter exhibited precession that was clearest when rodents approached the decision point in a maze<sup>28</sup>. Given that  
236 we found goal-state phase precession across various brain regions, including frontal cortex, these prior works further  
237 support the hypothesis that precession may represent “episodic” position within top-down behavioral states.

238 It is important to understand the prevalence of phase precession due to its likely theoretical relevance as neuronal  
239 mechanism for binding and compressing sequential events. In brief, phase precession organizes spiking at time  
240 intervals below the deactivation time constant of NMDA receptors, facilitating synaptic plasticity between neurons that  
241 encode events at behavioral time-scales<sup>7,10,24,75–77</sup>. Strengthening associations between consecutively active neurons  
242 may be a widely useful mechanism for learning associations. Our findings extend phase precession to the human  
243 brain and demonstrate that precession does not necessarily depend on physiological constraints, such as a stationary  
244 ~8 Hz theta oscillations<sup>25,51,55,65,66</sup>. Furthermore, our results show that a consistent difference between spiking and  
245 LFP frequency extends beyond place- or grid- field activity and may represent non-spatial mental sequences related to  
246 a memory task. This consistent spike–LFP frequency difference has been characterized by oscillatory-interference  
247 models as a function of spatial inputs, such as velocity, but may include non-spatial inputs if they increase spiking  
248 frequency above the network oscillation<sup>78,79</sup>. Therefore, our findings demonstrate the potential utility for phase  
249 precession in humans, across diverse brain regions, as a general, domain-free mechanism for temporal compression of  
250 specific experiences.

251 In summary, we have provided evidence for spatial phase precession in the human hippocampus and entorhinal  
252 cortex during virtual navigation and shown that it exhibits features similar to those seen in rodents. Further, we also  
253 demonstrated the existence of phase precession that is specific to trajectories to particular goals. These findings suggest  
254 that phase precession is a general mechanism for temporal coding in the human brain, despite the heterogeneity in

255 theta rhythmicity in human MTL. Furthermore, the discovery of goal-state phase precession extends the potential for  
256 phase coding to be physiologically relevant for an array of experiential features, even when the neurons do not show  
257 concurrent firing rate changes for those features. Overall, our results suggest that phase precession is an important  
258 neural code across species and brain regions, not only for spatial cognition and memory but also for non-spatial  
259 features of experience.

## 260 Methods

261 **Data recording and participants.** The thirteen participants in our study were epilepsy patients who had Behnke–Fried  
262 microelectrodes<sup>80</sup> (Ad-Tech Medical) surgically implanted in the course of clinical seizure mapping at the University  
263 of California, Los Angeles. The Medical Institutional Review Board at the University of California-Los Angeles  
264 approved this study (IRB 10–000973), and patients provided informed consent to participate in research. Microwire  
265 signals were recorded at 28–32 kHz, and we used Combinato for spike detection and sorting<sup>81</sup>. Manual sorting  
266 identified single- versus multi-unit activity versus noise on the basis of previously determined criteria<sup>82,83</sup>. The local  
267 field potential for each neuron was recorded from the local microelectrodes and was downsampled to 250 Hz for  
268 spectral analysis. For comparison with rodent data we used a publicly available dataset (CRCNS hc-2, hc-3)<sup>41,42,84</sup>.

269 **Task.** This behavioral task is described in several previous studies<sup>39,40,58,85</sup>. Subjects first learned the navigational  
270 controls during a 4-delivery training session in a large, wide-open arena. After the practice session, subjects performed  
271 the main task, in which they were instructed to drive passengers to one of 6 goal stores in the virtual environment.  
272 Upon arrival, on-screen text displayed the name of the next randomly selected destination store. The task was  
273 self-paced in order to accommodate patient testing needs and therefore subjects performed at ceiling. The size of  
274 the virtual environment was  $10 \times 10$  VR units, the width of the road was 2.5 VR units, and the obstructed area in  
275 the center of the road was  $5 \times 5$  VR units. During navigation, subjects had a  $60^\circ$  field of view, a maximum forward  
276 speed of 1.25 VR units/s, a maximum backward speed was 0.5 VR units/s, and maximum angular velocity of  $40^\circ$ /s.  
277 To encourage subjects to take the shortest route to each destination, subjects received 50 points for each successful  
278 delivery and had one point deducted for each second that they spent navigating. Points were constantly displayed  
279 on-screen. Patients performed an average of  $73 \pm 11$  deliveries in each session. To assess performance on this task,  
280 we measured subjects' excess path length (EPL) on each trajectory, defined as ratio of the actual path length to the  
281 ideal path length. We computed ideal path length on each trial using the A-star search algorithm to identify the most  
282 computationally efficient path between goals in the environment<sup>86</sup>.

283 **Statistical analysis and software.** All statistical analyses were carried out in Python, primarily using the SciPy<sup>87</sup>  
284 and statsmodels<sup>88</sup> libraries. For comparisons between two groups, we primarily utilized the Wilcoxon rank-sum test  
285 unless otherwise specified. For omnibus testing, we used ANOVAs, determining the p-value by comparing the real  
286 test-statistic to those from empirically derived null distributions generated by shuffling the true data. All figures were  
287 made using the Matplotlib<sup>89</sup> and Seaborn libraries.

288 **Characterizing place-cell activity.** To assess how neuronal activity related to the subject's virtual spatial location,  
289 first, we binned the environment into a  $10 \times 10$  spatial grid. We computed the firing rate map for each neuron by  
290 dividing the number of spikes by the amount of time spent in each spatial bin. We then used an ANOVA to assess  
291 whether the interaction of X and Y spatial bin (and thus 2D position) significantly modulated firing rate. To assess the  
292 significance of the ANOVA we circularly shuffled the firing rate and generated 500 surrogate test-statistics, and used  
293 this null distribution to determine the shuffle-corrected p-value of the ANOVA using the real data. These p-values  
294 were then FDR-corrected for multiple comparisons between the three movement types (CW, CCW, bi-directional).

295 Only neurons with critical statistics exceeding 99% of the shuffled data ( $p < 0.01$ ) were considered to be spatially  
296 modulated. We considered spatially-modulated neurons to be analogous to place- and grid- cells, because the firing  
297 rate in at least one spatial bin deviated significantly from the others. We identified the spatial bin with the highest  
298 firing rate (analogous to the center of a place- or grid- field). We only included a spatial bin if the person passed  
299 through it at least 3 times, and occupied it for at least 4 seconds.

300 **Spectral analysis of LFP and spike time.** To assess the prevalence and frequency of theta oscillations in the human  
301 and rodent LFP, we computed the continuous Morlet wavelet transform (wave number 6) at 20 logarithmically spaced  
302 frequencies between 1 and 32 Hz. Then, to identify theta-like oscillations, we utilized an iterative algorithm to subtract



303 the aperiodic background and fit a Gaussian to putative peaks<sup>90</sup>. For this fitting procedure, we restricted the maximum  
304 number of peaks to 2, and the maximum peak width to 4 Hz. We only assessed the peak height (parameterized as the  
305 height of the Gaussian's peak relative to the aperiodic background) and the peak frequency (parameterized as the  
306 center frequency at which the Gaussian reaches its peak) for the largest peak in the PSD. To assess the prevalence and  
307 frequency of theta oscillations in human and rodent spiking, we computed the autocorrelation of spike times, and  
308 performed a fast Fourier transform (FFT), yielding the PSD of the spike train.

309 **Phase estimation.** We estimated the instantaneous phase of LFPs in the theta frequency range. Theta oscillations  
310 in human hippocampal formation are often bursty and non-stationary, and vary from low (2–5 Hz) to high (5–  
311 10 Hz) frequencies<sup>43,62,63</sup> - similar patterns are observed in bats<sup>91</sup> and non-human primates<sup>92,93</sup>. In order to analyze  
312 fluctuations in the LFP analogous to rodent theta, we estimated 2–10 Hz phase by identifying peaks, troughs, and  
313 midpoints in the lowpass-filtered LFP, and linearly interpolated between these points. This phase-interpolation method  
314 has been used previously to effectively estimate theta phase in bats<sup>55</sup>, as well as in rodents<sup>94,95</sup>. To ensure that phase  
315 estimates were not based on an unreliable low amplitude signal, we computed the instantaneous power of the LFP  
316 and discarded those time-points in which the power fell below a 25th percentile threshold<sup>55</sup>.

317 **Spatial phase precession.** To identify phase precession in this dataset, for each spatially modulated cell we first  
318 identified every trajectory through the cell's peak firing location. Following the methods used in some recent studies  
319 for measuring phase precession<sup>55,96,97</sup>, first for each such trajectory, we identified the spike closest to the center of  
320 the bin as the center spike (our reference point for the center of the bin on each trajectory)<sup>55,96,97</sup>. We limited our  
321 analysis to spikes in close spatial proximity to the center of the peak firing bin. To do so, we only analyzed the 11  
322 closest spikes to the center of the peak firing bin. To ensure that these 11 spikes did not occur too distant from the  
323 peak firing bin, we set a diameter threshold of 40% of the environmental width, meaning that we did not analyze  
324 spikes that occurred further than 2 VR-units from the center of the peak firing bin. We re-ran our analyses while  
325 varying the inclusion criterion for the number of spikes (9, 11, & 13) and the radius (40% & 60%) and found that the  
326 parameters we selected did not significantly affect the proportion of cells exhibiting spatial phase precession ( $\chi^2 =$   
327 5.25,  $p = 0.5$ , chi-squared test).

328 We next tested for phase precession using circular statistics. Specifically, for each cell we measured the relation  
329 between spike phase and the subject's position by computing the circular-linear correlation coefficient<sup>47</sup>. To assess  
330 statistical significance, we used a shuffling procedure. For each cell we computed a surrogate distribution for this  
331 correlation coefficient by assigning random phases to each spike from the distribution of all the spike phases for that  
332 neuron, and re-computing the correlation 500 times. This null distribution effectively scrambled the relationship  
333 between spike position and spike phase and controlled for any effect of spurious phase estimates. A circular-linear  
334 correlation was considered significant only if it exceeded the 95<sup>th</sup> percentile of this surrogate distribution.

335 **Control analyses for spatial phase precession.** We performed two control analyses for alternative explanations  
336 for the spatial phase precession we observed. The first analysis tested whether the peak firing bin, our analogue to the  
337 place-field center, was important to observing precession. To do so, we selected control locations for each cell and  
338 assessed the strength and prevalence in these control bins. Control bins were chosen as to not overlap with the peak  
339 firing bin (at least 30 % of the map width away) and also had to be traversed a minimum of 3 times with a minimum  
340 firing rate of 0.5 Hz. Furthermore, because we only analyzed the 11 spikes in the immediate vicinity of the peak firing  
341 bin, control bins matched the peak firing bin in sample size of spikes per trajectory, ensuring that effects were not  
342 confounded by firing rate differences.

343 Another possible alternative explanation for our findings is that the phase precession we observed here is actually  
344 encoding time to peak firing, independent of spatial position, with particular spike phases occurring at specific  
345 time-intervals within any epoch of elevated firing rate<sup>98</sup>. To control for this possibility, we identified epochs of  
346 elevated firing rate in the time domain without any information about position, which we refer to as "firing rate  
347 motifs"<sup>98</sup>. We identified the spike that occurred closest in time to the peak firing of each motif field, and used the 11



348 spikes in the immediate temporal vicinity (within 2 seconds before or after) to compute a circular-linear correlation  
349 between spike phase and spike time relative to the motif field peak, matching our spatial phase precession analysis.

350 **Non-spatial phase precession** To measure non-spatial phase precession without reference to place fields, we  
351 compared the spiking frequency of each neuron to the frequency of the local LFP, with relatively faster rhythmic  
352 spiking classified as phase precession<sup>42,49</sup>. However, detecting oscillations in spike times alone is difficult in humans  
353 (Supplementary Fig. 6) and bats<sup>55</sup>, potentially due to the transient, non-stationary nature of theta observed in these  
354 species<sup>55,63</sup>. Instead, we applied a method introduced by Mizuseki et al.<sup>42</sup> which measures spiking frequency relative  
355 to the ongoing LFP. This is a particularly useful method when the ongoing LFP is non-stationary but may still be  
356 an important reference “clock” for neuronal spiking. To perform this procedure, we computed the autocorrelation  
357 histogram of each neuron based on the timescale determined by the phase of the reference LFP, rather than the  
358 conventional method of using absolute time. We computed this autocorrelation using 60°-bins with window-length  
359 of 4 cycles<sup>55</sup>. We then computed the Fourier transform of the autocorrelation histogram to yield the power spectral  
360 density (PSD) of the frequency of spiking relative to the LFP. Here, a peak relative frequency greater than 1.0 indicates  
361 that the cell is oscillating at a faster frequency than the reference LFP. We excluded neurons that exhibited both a  
362 peak near 1.0 as and significant phase-locking ( $p < 0.05$ , Rayleigh test) to ensure that we did not mistakenly identify  
363 phase-locked neurons<sup>85</sup> as exhibiting phase precession. To measure the strength of this effect we measured the  
364 amplitude of the PSD, normalized by the total amplitude across all other relative frequencies<sup>26</sup>, which we refer to as  
365 the “modulation index” (MI) (Fig. 4A).

366 In order to ensure that our results did not arise from poor phase estimates due to low LFP amplitude, we discarded  
367 spikes that occurred during the lowest 25<sup>th</sup> percentile of LFP power in the oscillation of interest<sup>26,55</sup>. In order to  
368 ensure that low spike counts did not confound our estimates we only analyzed cells with more than 100 valid spike-  
369 phase estimates for the autocorrelation. We compared the modulation index to the null distribution of modulation  
370 indices for the peak frequency generated by circularly-shuffling the phases within each cycle of theta. This rigorous,  
371 within-cell shuffling ensured that cross-cycle dynamics (such as precession) were disrupted while maintaining slower  
372 and more rapid spiking dynamics<sup>26,55</sup>. The modulation index was considered significant if it exceeded the 95<sup>th</sup>  
373 percentile of this surrogate distribution. Finally, we excluded cells that exhibited significant phase-locking during the  
374 entire session (Rayleigh test) in order to ensure that peaks close to 1.0 did not result from phase-locked spiking.

375 **Goal-state phase precession** To measure goal-state phase precession, we separately applied our analysis of non-  
376 spatial precession to spiking during each of the six goal trials. We only included neurons for which we observed at  
377 least 100 spikes per goal, to allow us to analyze non-spatial precession for each goal. We established two tests to  
378 characterize significant goal-state phase precession. First, just as we did with session-wide non-spatial precession,  
379 the magnitude of detected phase precession (as indicated by a peak in the spike-phase spectra exceeding 1.0) had  
380 to be greater than the 95<sup>th</sup> percentile of the shuffled distribution. Because we conducted this test for all six goals  
381 separately, we used the False Discovery Rate procedure<sup>99</sup> to correct the resulting p-values for multiple corrections  
382 across goals. If a goal exhibited significant non-spatial precession, we then compared the goal-specific modulation  
383 index to a surrogate distribution of modulation indices generated by selecting 500 random spike-trains from across  
384 the entire session. Each null spike-train was generated to match the number of spikes recorded during the significant  
385 goal to ensure that firing rate differences did not account for our results. A significant p-value indicated goal-state  
386 precession that was significantly stronger for the goal in question than for the session as a whole.

## 387 Acknowledgements

388 We are grateful to the patients for participating in our study. This work was supported by the National Institute  
389 of Mental Health (R01-MH104606) and the National Science Foundation (to J.J.), and NSF Graduate Research  
390 Fellowship DGE 16-44869 (to S.E.Q.). We thank Kamran Diba, Sam McKenzie, Jonathan Miller, Andrew Watrous,  
391 and Melina Tsitsiklis for helpful comments and suggestions.

## 392 **Author Contributions**

393 Conceptualization, J.J. and S.E.Q.; Methodology, J.J. and S.E.Q.; Investigation, I.F. and J.J.; Software, S.E.Q.;  
394 Formal Analysis, S.E.Q.; Writing – Original Draft, S.E.Q.; Writing – Review Editing, S.E.Q., J.J., and I.F.; Funding  
395 Acquisition, I.F., J.J., and S.E.Q.; Resources, I.F. and J.J.; Visualization, S.E.Q. and J.J.; Supervision, J.J.

## 396 **Declaration of Interests**

397 The authors declare no competing interests.

## References

- 398
- 399 [1] Scoville, W. B. & Milner, B. Loss of recent memory after bilateral hippocampal lesions. *Journal of Neurology,*  
400 *Neurosurgery, and Psychiatry* **20**, 11–21 (1957).
- 401 [2] O’Keefe, J. A review of hippocampal place cells. *Prog Neurobiol* **13**, 419–439 (1979).
- 402 [3] Morris, R. G., Garrud, P., Rawlins, J. N. & O’Keefe, J. Place navigation impaired in rats with hippocampal  
403 lesions. *Nature* **297**, 681–3 (1982).
- 404 [4] Burgess, N., Maguire, E. & O’Keefe, J. The human hippocampus and spatial and episodic memory. *Neuron* **35**,  
405 625–641 (2002).
- 406 [5] Hebb, D. O. *Organization of Behavior* (New York: Wiley, 1949).
- 407 [6] MacKay, D. M. & McCulloch, W. S. The limiting information capacity of a neuronal link. *The bulletin of*  
408 *mathematical biophysics* **14**, 127–135 (1952). URL <https://doi.org/10.1007/BF02477711>.
- 409 [7] Greenstein, Y. J., Pavlides, C. & Winson, J. Long-term potentiation in the dentate gyrus is preferentially induced  
410 at theta rhythm periodicity. *Brain Res* **438**, 331–4 (1988).
- 411 [8] Hopfield, J. J. Pattern recognition computation using action potential timing for stimulus representation. *Nature*  
412 **376**, 33–6 (1995).
- 413 [9] Markram, H., Lübke, J., Frotscher, M. & Sakmann, B. Regulation of synaptic efficacy by coincidence of  
414 postsynaptic aps and epsps. *Science* **275**, 213–215 (1997).
- 415 [10] Bi, G. & Poo, M. Synaptic modification by correlated activity: Hebb’s postulate revisited. *Annu Rev Neurosci*  
416 **24**, 139–66 (2001).
- 417 [11] Bragin, A. *et al.* Gamma (40-100 Hz) oscillation in the hippocampus of the behaving rat. *Journal of Neuroscience*  
418 **15**, 47–60 (1995).
- 419 [12] Chrobak, J. J. & Buzsáki, G. Gamma oscillations in the entorhinal cortex of the freely behaving rat **18**, 388–298  
420 (1998).
- 421 [13] Manning, J. R., Jacobs, J., Fried, I. & Kahana, M. J. Broadband shifts in local field potential power spectra are  
422 correlated with single-neuron spiking in humans. *Journal of Neuroscience* **29**, 13613–13620 (2009).
- 423 [14] Canolty, R. T. *et al.* Oscillatory phase coupling coordinates anatomically dispersed functional cell assemblies.  
424 *Proc Natl Acad Sci U S A* **107**, 17356–61 (2010).
- 425 [15] Zanos, S., Zanos, T. P., Marmarelis, V. Z., Ojemann, G. A. & Fetz, E. E. Relationships between spike-free local  
426 field potentials and spike timing in human temporal cortex. *J Neurophysiol* **107**, 1808–21 (2012).
- 427 [16] Buzsaki, G., Anastassiou, C. & Koch, C. The origin of extracellular fields and currents - eeg, ecog, lfp and  
428 spikes. *Nature Reviews Neuroscience* **13**, 407–419 (2012).
- 429 [17] Siegel, M., Warden, M. & Miller, E. Phase-dependent neuronal coding of objects in short-term memory.  
430 *Proceedings of the National Academy of Sciences, USA* **106**, 21341 (2009).
- 431 [18] Rutishauser, U., Ross, I., Mamelak, A. & Schuman, E. Human memory strength is predicted by theta-frequency  
432 phase-locking of single neurons. *Nature* **464**, 903–907 (2010).
- 433 [19] O’Keefe, J. & Recce, M. L. Phase relationship between hippocampal place units and the EEG theta rhythm.  
434 *Hippocampus* **3**, 317–30 (1993).

- 435 [20] Hastie, T., Tibshirani, R. & Friedman, J. *The elements of statistical learning*, chap. Unsupervised Learning,  
436 485–585 (Springer, New York, 2009).
- 437 [21] Reifenstein, E. T., Kempter, R., Schreiber, S., Stemmler, M. B. & Herz, A. V. M. Grid cells in rat entorhinal  
438 cortex encode physical space with independent firing fields and phase precession at the single-trial level. *Proc*  
439 *Natl Acad Sci U S A* **109**, 6301–6 (2012).
- 440 [22] Lisman, J. & Idiart, M. A. Storage of  $7 \pm 2$  short-term memories in oscillatory subcycles. *Science* **267**,  
441 1512–1515 (1995).
- 442 [23] Skaggs, W. E., McNaughton, B. L., Wilson, M. A. & Barnes, C. A. Theta phase precession in hippocampal  
443 neuronal populations and the compression of temporal sequences. *Hippocampus* **6**, 149–172 (1996).
- 444 [24] Reifenstein, E. T. & Kempter, R. Synaptic learning rules for sequence learning. *bioRxiv* (2020). URL [https://](https://www.biorxiv.org/content/early/2020/04/15/2020.04.13.039826)  
445 [www.biorxiv.org/content/early/2020/04/15/2020.04.13.039826](https://www.biorxiv.org/content/early/2020/04/15/2020.04.13.039826). [https://www.biorxiv.org/](https://www.biorxiv.org/content/early/2020/04/15/2020.04.13.039826.full.pdf)  
446 [content/early/2020/04/15/2020.04.13.039826.full.pdf](https://www.biorxiv.org/content/early/2020/04/15/2020.04.13.039826.full.pdf).
- 447 [25] van der Meer, M. A. A. & Redish, A. D. Theta phase precession in rat ventral striatum links place and reward  
448 information. *J Neurosci* **31**, 2843–54 (2011).
- 449 [26] Kim, S. M., Ganguli, S. & Frank, L. M. Spatial information outflow from the hippocampal circuit: distributed  
450 spatial coding and phase precession in the subiculum. *J Neurosci* **32**, 11539–58 (2012).
- 451 [27] Tingley, D., Alexander, A. S., Quinn, L. K., Chiba, A. A. & Nitz, D. Multiplexed oscillations and phase rate  
452 coding in the basal forebrain. *Sci Adv* **4**, eaar3230 (2018).
- 453 [28] Jones, M. W. & Wilson, M. A. Phase precession of medial prefrontal cortical activity relative to the hippocampal  
454 theta rhythm. *Hippocampus* **15**, 867–873 (2005).
- 455 [29] Harris, K. D. *et al.* Spike train dynamics predicts theta-related phase precession in hippocampal pyramidal cells.  
456 *Nature* **417**, 738–741 (2002).
- 457 [30] Pastalkova, E., Itskov, V., Amarasingham, A. & Buzsáki, G. Internally generated cell assembly sequences in the  
458 rat hippocampus. *Science* **321**, 1322 – 1327 (2008).
- 459 [31] Lenck-Santini, P.-P., Fenton, A. A. & Muller, R. U. Discharge properties of hippocampal neurons during  
460 performance of a jump avoidance task. *Journal of Neuroscience* (2008).
- 461 [32] Takahashi, M., Nishida, H., Redish, A. D. & Lauwereyns, J. Theta phase shift in spike timing and modulation  
462 of gamma oscillation: a dynamic code for spatial alternation during fixation in rat hippocampal area ca1. *J*  
463 *Neurophysiol* **111**, 1601–14 (2014).
- 464 [33] Aronov, D., Nevers, R. & Tank, D. W. Mapping of a non-spatial dimension by the hippocampal–entorhinal  
465 circuit. *Nature* **543**, 719 (2017).
- 466 [34] Terada, S., Sakurai, Y., Nakahara, H. & Fujisawa, S. Temporal and rate coding for discrete event sequences in  
467 the hippocampus. *Neuron* **94**, 1248–1262.e4 (2017).
- 468 [35] Robinson, N. T. M. *et al.* Medial entorhinal cortex selectively supports temporal coding by hippocampal neurons.  
469 *Neuron* **94**, 677–688.e6 (2017).
- 470 [36] Burgess, N., Recce, M. & O’Keefe, J. A model of hippocampal function. *Neural Networks* **7**, 1065 – 1081  
471 (1994). URL <http://www.sciencedirect.com/science/article/pii/S0893608005801595>. Models  
472 of Neurodynamics and Behavior.

- 473 [37] Lisman, J. The theta/gamma discrete phase code occurring during the hippocampal phase precession may be a  
474 more general brain coding scheme. *Hippocampus* **15**, 913–922 (2005).
- 475 [38] Jaramillo, J. & Kempter, R. Phase precession: a neural code underlying episodic memory? *Curr Opin Neurobiol*  
476 **43**, 130–138 (2017).
- 477 [39] Jacobs, J., Kahana, M. J., Ekstrom, A. D., Mollison, M. V. & Fried, I. A sense of direction in human entorhinal  
478 cortex. *Proceedings of the National Academy of Sciences* **107**, 6487–6482 (2010).
- 479 [40] Miller, J. F., Fried, I., Suthana, N. & Jacobs, J. Repeating spatial activations in human entorhinal cortex. *Current*  
480 *Biology* (2015).
- 481 [41] Mizuseki, K., Sirota, A., Pastalkova, E. & Buzsáki, G. Multiple single unit recordings from different rat  
482 hippocampal and entorhinal regions while the animals were performing multiple behavioral tasks. *crcns.org*.  
483 URL <http://dx.doi.org/10.6080/K09G5JRZ>.
- 484 [42] Mizuseki, K., Sirota, A. & Buzsáki, G. Theta oscillations provide temporal windows for local circuit computation  
485 in the entorhinal-hippocampal loop. *Neuron* **64**, 267–280 (2009).
- 486 [43] Goyal, A. *et al.* Functionally distinct high and low theta oscillations in the human hippocampus. *Nat Commun*  
487 **11**, 2469 (2020).
- 488 [44] Jacobs, J. & Kahana, M. J. Direct brain recordings fuel advances in cognitive electrophysiology. *Trends in*  
489 *Cognitive Sciences* **14**, 162–171 (2010).
- 490 [45] Souza, B. C. & Tort, A. B. L. Asymmetry of the temporal code for space by hippocampal place cells. *Sci Rep* **7**,  
491 8507 (2017).
- 492 [46] Reifensstein, E., Stemmler, M., Herz, A. V. M., Kempter, R. & Schreiber, S. Movement dependence and layer  
493 specificity of entorhinal phase precession in two-dimensional environments. *PLoS One* **9**, e100638 (2014).
- 494 [47] Kempter, R., Leibold, C., Buzsáki, G., Diba, K. & Schmidt, R. Quantifying circular–linear associations:  
495 Hippocampal phase precession. *Journal of Neuroscience Methods* **207**, 113–124 (2012).
- 496 [48] Fisher, N. I. *Statistical Analysis of Circular Data* (Cambridge University Press, Cambridge, England, 1993).
- 497 [49] Geisler, C., Robbe, D., Zugaro, M., Sirota, A. & Buzsáki, G. Hippocampal place cell assemblies are speed-  
498 controlled oscillators. *Proceedings of the National Academy of Sciences, USA* **104**, 8149 (2007).
- 499 [50] Harvey, C., Collman, F., Dombeck, D. & Tank, D. Intracellular dynamics of hippocampal place cells during  
500 virtual navigation. *Nature* **461**, 941–946 (2009).
- 501 [51] Bush, D. & Burgess, N. Advantages and detection of phase coding in the absence of rhythmicity. *Hippocampus*  
502 (2020).
- 503 [52] Geisler, C. *et al.* Temporal delays among place cells determine the frequency of population theta oscillations in  
504 the hippocampus. *Proceedings of the National Academy of Sciences, USA* **107**, 7957–7962 (2010).
- 505 [53] Middleton, S. J. *et al.* Altered hippocampal replay is associated with memory impairment in mice heterozygous  
506 for the *scn2a* gene. *Nat Neurosci* **21**, 996–1003 (2018).
- 507 [54] Bourboulou, R. *et al.* Dynamic control of hippocampal spatial coding resolution by local visual cues. *Elife* **8**  
508 (2019).
- 509 [55] Eliav, T. *et al.* Nonoscillatory phase coding and synchronization in the bat hippocampal formation. *Cell* **175**,  
510 1119–1130.e15 (2018).

- 511 [56] Petersen, P. C. & Buzsáki, G. Cooling of medial septum reveals theta phase lag coordination of hippocampal  
512 cell assemblies. *Neuron* (2020).
- 513 [57] Brown, T. I. *et al.* Prospective representation of navigational goals in the human hippocampus. *Science* **352**,  
514 1323–6 (2016).
- 515 [58] Watrous, A. J., Miller, J., Qasim, S. E., Fried, I. & Jacobs, J. Phase-tuned neuronal firing encodes human  
516 contextual representations for navigational goals. *eLife* **7**, e32554 (2018).
- 517 [59] Hafting, T., Fyhn, M., Molden, S., Moser, M.-B. & Moser, E. I. Microstructure of a spatial map in the entorhinal  
518 cortex. *Nature* **436**, 801–806 (2005).
- 519 [60] Ekstrom, A. D. *et al.* Cellular networks underlying human spatial navigation. *Nature* **425**, 184–187 (2003).
- 520 [61] Jacobs, J. *et al.* Direct recordings of grid-like neuronal activity in human spatial navigation. *Nature Neuroscience*  
521 **16**, 1188–1190 (2013).
- 522 [62] Jacobs, J. Hippocampal theta oscillations are slower in humans than in rodents: implications for models of  
523 spatial navigation and memory. *Philosophical Transactions of the Royal Society B: Biological Sciences* **369**,  
524 20130304 (2014).
- 525 [63] Watrous, A. J. *et al.* A comparative study of human and rat hippocampal low-frequency oscillations during  
526 spatial navigation. *Hippocampus* (2013).
- 527 [64] Courellis, H. S. *et al.* Spatial encoding in primate hippocampus during free navigation. *PLoS Biol* **17**, e3000546  
528 (2019).
- 529 [65] Royer, S., Sirota, A., Patel, J. & Buzsáki, G. Distinct representations and theta dynamics in dorsal and ventral  
530 hippocampus. *The Journal of neuroscience* **30**, 1777–1787 (2010).
- 531 [66] Schlesiger, M. I. *et al.* The medial entorhinal cortex is necessary for temporal organization of hippocampal  
532 neuronal activity. *Nat Neurosci* **18**, 1123–32 (2015).
- 533 [67] Moser, E., Kropff, E. & Moser, M. Place cells, grid cells, and the brain’s spatial representation system. *Annu*  
534 *Rev Neurosci* **31**, 69–89 (2008).
- 535 [68] Wikenheiser, A. M. & Redish, A. D. Hippocampal theta sequences reflect current goals. *Nat Neurosci* **18**,  
536 289–94 (2015).
- 537 [69] Meshulam, L., Gauthier, J. L., Brody, C. D., Tank, D. W. & Bialek, W. Collective behavior of place and  
538 non-place neurons in the hippocampal network. *Neuron* **96**, 1178–1191.e4 (2017).
- 539 [70] Qasim, S. E. *et al.* Memory retrieval modulates spatial tuning of single neurons in the human entorhinal cortex.  
540 *Nat Neurosci* **22**, 2078–2086 (2019).
- 541 [71] Huxter, J., Burgess, N. & O’Keefe, J. Independent rate and temporal coding in hippocampal pyramidal cells.  
542 *Nature* **425**, 828–832 (2003).
- 543 [72] O’Keefe, J. & Burgess, N. Dual phase and rate coding in hippocampal place cells: theoretical significance and  
544 relationship to entorhinal grid cells. *Hippocampus* **15**, 853–866 (2005).
- 545 [73] Hirase, H., Czurkó, A., Csicsvari, J. & Buzsáki, G. Firing rate and theta-phase coding by hippocampal pyramidal  
546 neurons during ‘space clamping’. *Eur J Neurosci* **11**, 4373–80 (1999).
- 547 [74] Howard, L. R. *et al.* The hippocampus and entorhinal cortex encode the path and euclidean distances to goals  
548 during navigation. *Current Biology* **24**, 1331–1340 (2014).



- 549 [75] Debanne, D., Gähwiler, B. H. & Thompson, S. M. Long-term synaptic plasticity between pairs of individual ca3  
550 pyramidal cells in rat hippocampal slice cultures. *J Physiol* **507** ( Pt 1), 237–47 (1998).
- 551 [76] Debanne, D., Guérineau, N. C., Gähwiler, B. H. & Thompson, S. M. Physiology and pharmacology of unitary  
552 synaptic connections between pairs of cells in areas ca3 and ca1 of rat hippocampal slice cultures. *J Neurophysiol*  
553 **73**, 1282–94 (1995).
- 554 [77] Jensen, O. & Lisman, J. E. Position reconstruction from an ensemble of hippocampal place cells: contribution  
555 of theta phase coding. *J. Neurophysiol.* **83**, 2602–2609 (2000).
- 556 [78] Burgess, N., Barry, C., O’Keefe, J. & London, U. An oscillatory interference model of grid cell firing.  
557 *Hippocampus* **17**, 801–12 (2007).
- 558 [79] Hasselmo, M. E. Grid cell mechanisms and function: Contributions of entorhinal persistent spiking and phase  
559 resetting. *Hippocampus* **18**, 1213–1229 (2008).
- 560 [80] Fried, I. *et al.* Cerebral microdialysis combined with single-neuron and electroencephalographic recording in  
561 neurosurgical patients. *Journal of Neurosurgery* **91**, 697–705 (1999).
- 562 [81] Niediek, J., Boström, J., Elger, C. E. & Mormann, F. Reliable analysis of single-unit recordings from the human  
563 brain under noisy conditions: Tracking neurons over hours. *PLoS One* **11**, e0166598 (2016).
- 564 [82] Hill, D., Mehta, S. & Kleinfeld, D. Quality metrics to accompany spike sorting of extracellular signals. *Journal*  
565 *of Neuroscience* **31**, 8699–8705 (2011).
- 566 [83] Valdez, A. B., Hickman, E. N., Treiman, D. M., Smith, K. A. & Steinmetz, P. N. A statistical method for  
567 predicting seizure onset zones from human single-neuron recordings. *J Neural Eng* **10**, 016001 (2013).
- 568 [84] Mizuseki, K., Sirota, A., Pastalkova, E. & Buzsáki, G. Multi-unit recordings from the rat hippocampus made  
569 during open field foraging. URL <http://dx.doi.org/10.6080/K0Z60KZ9>.
- 570 [85] Jacobs, J., Kahana, M. J., Ekstrom, A. D. & Fried, I. Brain oscillations control timing of single-neuron activity  
571 in humans. *Journal of Neuroscience* **27**, 3839–3844 (2007).
- 572 [86] Russell, S. & Norvig, P. *Artificial Intelligence: A Modern Approach* (Prentice Hall, 2010), 3 edn.
- 573 [87] Virtanen, P. *et al.* Scipy 1.0: fundamental algorithms for scientific computing in python. *Nat Methods* **17**,  
574 261–272 (2020).
- 575 [88] Seabold, S. & Perktold, J. Statsmodels: Econometric and statistical modeling with python. In *9th Python in*  
576 *Science Conference* (2010).
- 577 [89] Hunter, J. D. Matplotlib: A 2d graphics environment. *Computing in Science & Engineering* **9**, 90–95 (2007).
- 578 [90] Haller, M. *et al.* Parameterizing neural power spectra. *bioRxiv* (2018). URL <https://www.biorxiv.org/content/early/2018/04/11/299859>.  
579 <https://www.biorxiv.org/content/early/2018/04/11/299859.full.pdf>.
- 581 [91] Ulanovsky, N. & Moss, C. Hippocampal cellular and network activity in freely moving echolocating bats.  
582 *Nature* 224–233 (2007).
- 583 [92] Stewart, M. & Fox, S. E. Hippocampal theta activities in monkeys. *Brain Res.* **538**, 59–63 (1991).
- 584 [93] Jutras, M. J., Fries, P. & Buffalo, E. A. Oscillatory activity in the monkey hippocampus during visual exploration  
585 and memory formation. *Proceedings of the National Academy of Sciences, USA* (2013).



- 586 [94] Siapas, A., Lubenov, E. & Wilson, M. Prefrontal phase locking to hippocampal theta oscillations. *Neuron* **46**,  
587 141–151 (2005).
- 588 [95] Cole, S. & Voytek, B. Cycle-by-cycle analysis of neural oscillations. *J Neurophysiol* **122**, 849–861 (2019).
- 589 [96] Huxter, J., Senior, T., Allen, K. & Csicsvari, J. Theta phase-specific codes for two-dimensional position,  
590 trajectory and heading in the hippocampus. *Nature Neuroscience* **11**, 587–594 (2008).
- 591 [97] Jeewajee, A. *et al.* Theta phase precession of grid and place cell firing in open environments. *Philos Trans R*  
592 *Soc Lond B Biol Sci* **369**, 20120532 (2014).
- 593 [98] Aghajan, Z. M. *et al.* Impaired spatial selectivity and intact phase precession in two-dimensional virtual reality.  
594 *Nature neuroscience* (2014).
- 595 [99] Benjamini, Y. & Hochberg, Y. Controlling the False Discovery Rate: a practical and powerful approach to  
596 multiple testing. *Journal of Royal Statistical Society, Series B* **57**, 289–300 (1995).

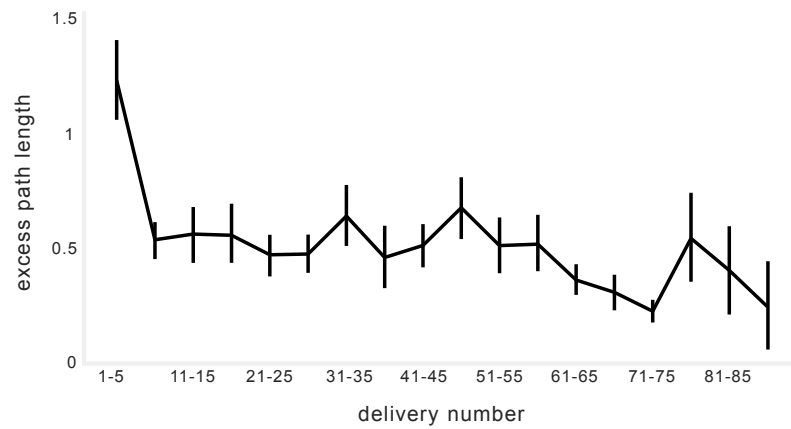

*Supplemental Figure 1: Behavioral performance in the task.* Plot indicates the mean excess path length across all sessions as a function of trial number.

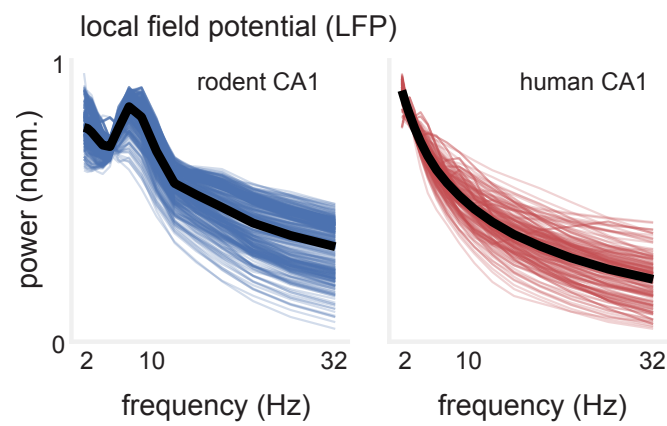

*Supplemental Figure 2: Differences in rodent and human hippocampal theta oscillations.* PSD of hippocampal LFPs recorded in navigating rodents (blue) and humans (red). Black line denotes average across channels. Rodent hippocampal LFP shows a clear peak in the 5-10 Hz range in almost all channels, while the human LFP does not.

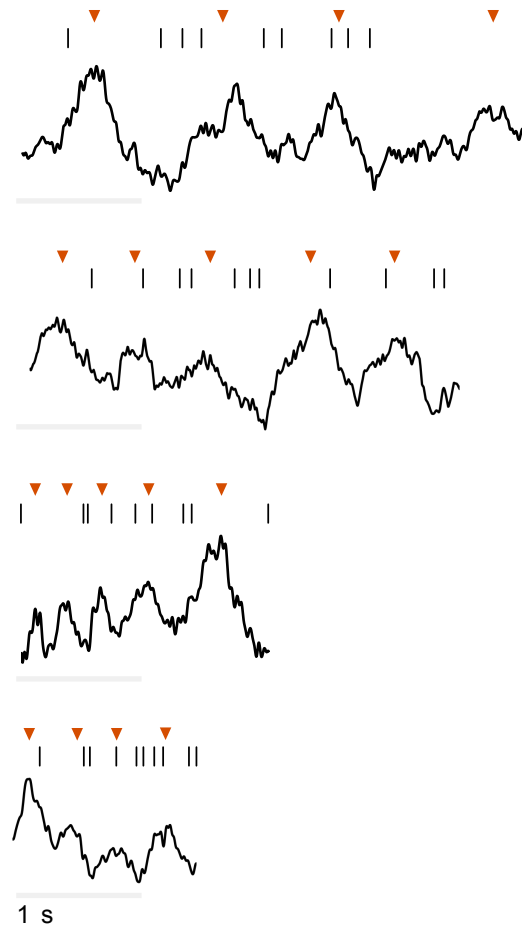

*Supplemental Figure 3: Examples of spatial phase precession during individual passes through a field.* Spike times and 1–30-Hz filtered LFP data during individual passes through peak firing bins for four neurons that exhibited significant spatial phase precession. Red arrows denote peaks of individual theta cycles.

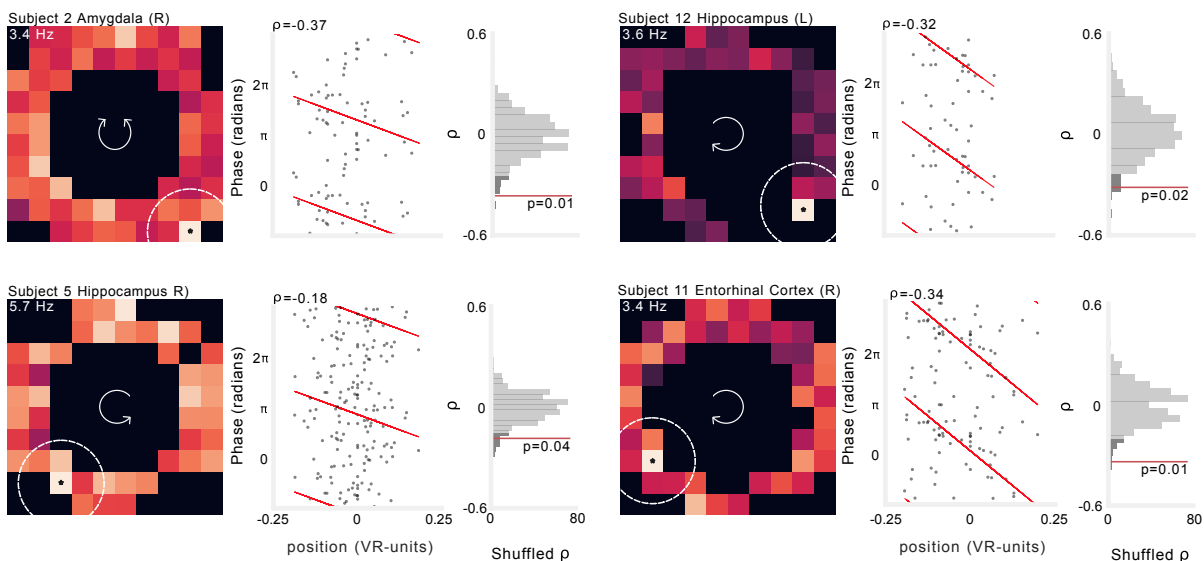

**Supplemental Figure 4: Additional examples of spatial phase precession.** The activity of four neurons that show significant spatial phase precession. Left: firing rate heat map. Brighter colors denote higher firing rates. Text label indicates the color scale for the plot with the mean firing rate of the peak firing bin, which is noted with an asterisk. Dotted lines indicate maximum radius around field in which spiking was assessed. Arrows in the center of the heatmap indicate the movement direction for which this plot was computed. Middle: spike phase as a function of location relative to the field center. Spike phases are duplicated vertically to enable visualization of circular-linear regression (red). Text indicates circular-linear regression coefficient ( $\rho$ ). Right: surrogate distribution of circular-linear regression  $\rho$ -values generated by permutation of spike phases. Red line indicates value of real data. Dark gray shading indicates 95<sup>th</sup> percentile of surrogate distribution.

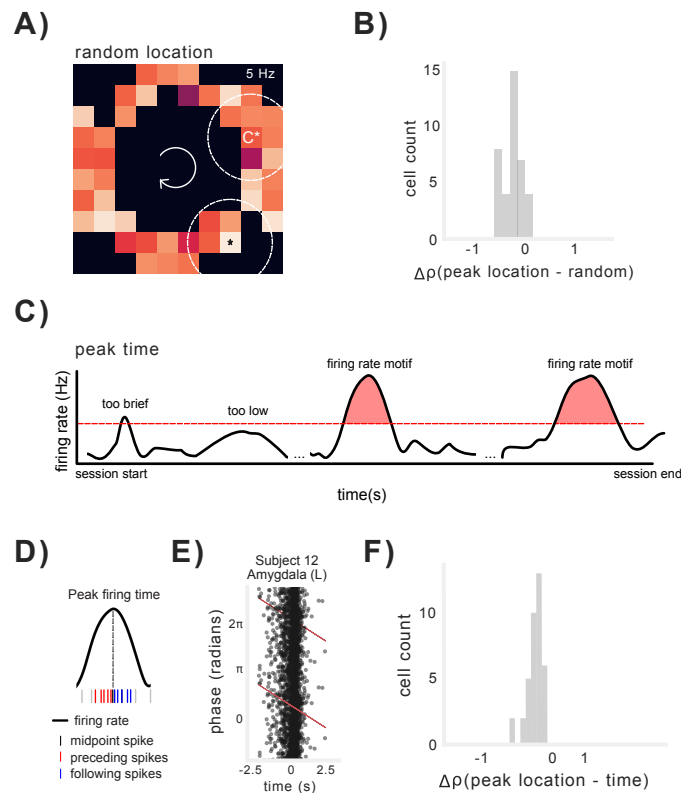

**Supplemental Figure 5: Location- and time- control analyses for spatial phase precession.** A) Example of alternate location selected to test whether peak firing bins exhibited significantly greater phase precession than randomly selected locations. B) Distribution of differences in circular-linear correlation coefficients for precession observed in peak firing bin vs. randomly selected location. C) Schematic of method for identifying elevated firing rate. Firing rate had to exceed a firing rate threshold of 1.5 Hz for at least 250 ms in order to be classified as a firing rate "motif". D) Schematic of method for time-based phase precession within motifs of elevated firing rate. E) Example neuron exhibiting significant phase precession relative to elapsed time within a firing rate motif. F) Distribution of differences in circular-linear correlation coefficients for precession observed in peak firing bin vs. time in firing motifs.

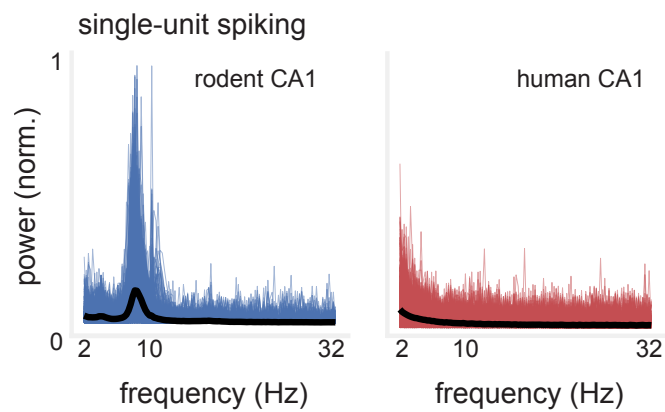

*Supplemental Figure 6: Differences in rodent and human hippocampal neuronal spiking.* Power spectral density from single-unit discharge from rodent (blue) and human (red) hippocampus. Solid black line indicates average across neurons. Rodent spiking shows clear theta modulation of spike timing while human spiking does not.



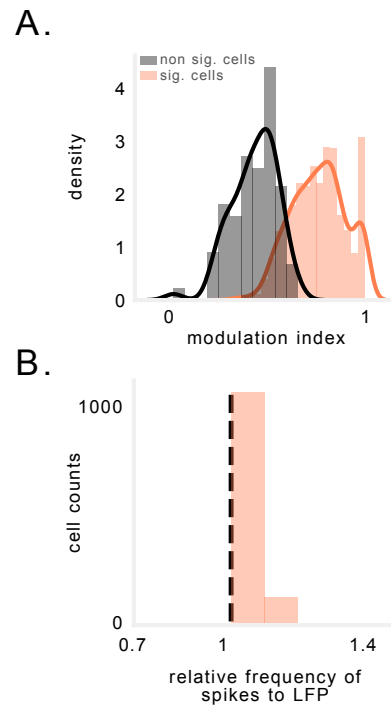

*Supplemental Figure 7: Phase precession in rodent CA1 without reference to position.* A) Modulation index (MI) of spike-phase spectral peaks for significant vs. non-significant neurons recorded in rodent CA1. B) Distribution of relative frequencies for neurons exhibiting significant MI in the spike-phase spectra. Values to the right of the black line indicate that the neuronal frequency slightly exceeded the LFP frequency.

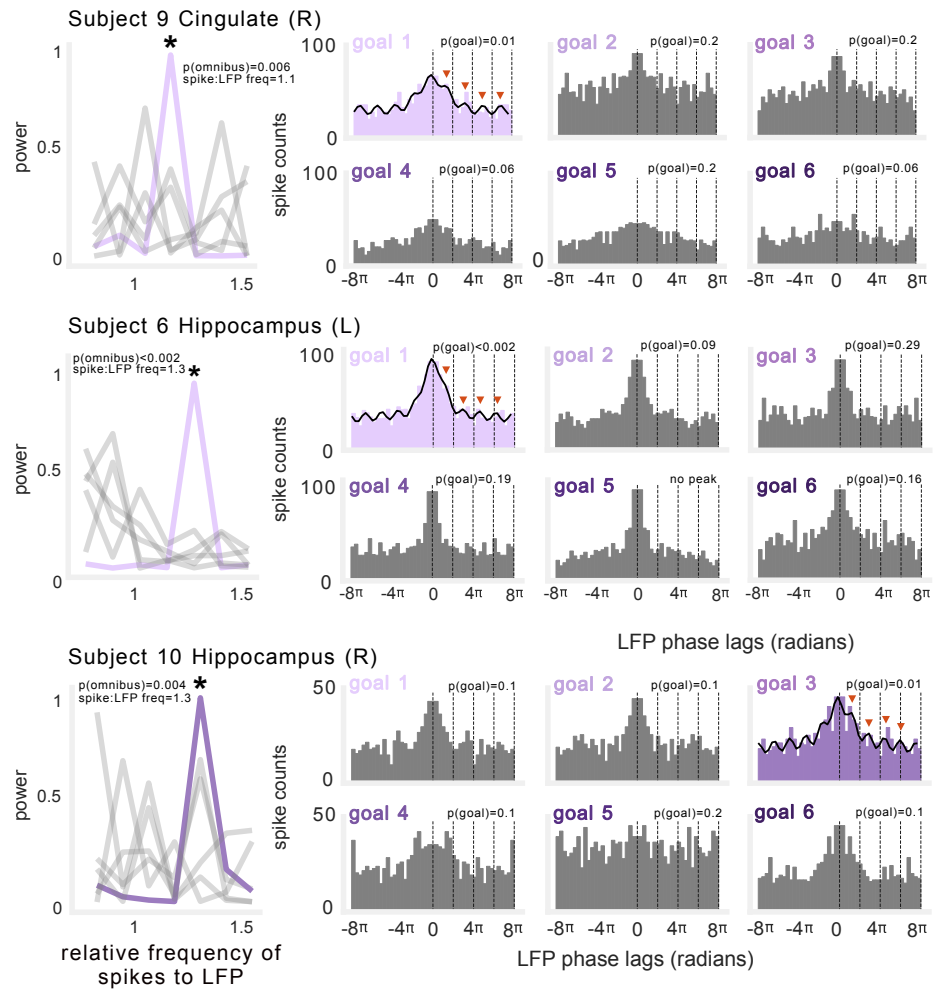

**Supplemental Figure 8: Additional examples of goal-specific phase precession.** Three example neurons exhibiting phase precession during navigation to specific goals. Left: Power spectral density depicting frequency of neuronal spiking relative to ongoing LFP. Asterisk denotes peaks that were significant and significantly different from other goals. Gray lines denote spike-phase spectra for non-significant goals. Right: Spike-phase autocorelograms during navigation to each goal (significant goal epochs depicted in color). Text indicates the p-value for both significance tests described in Figure 5C), and relative frequency of spiking to LFP. Black line indicates fit of decaying-oscillation function added to significant examples shows oscillation in spike-phase autocorelogram.

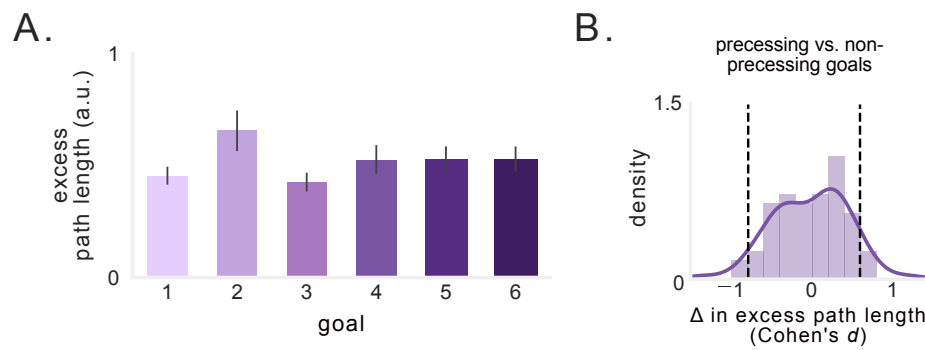

**Supplemental Figure 9: Goal-specific phase precession is not a function of a differences in navigation performance.** A) Excess path length as a function of goal. B) Distribution of Cohen's  $d$  comparing excess path length during trajectories to goals that showed precession vs. those that did not. Black dotted line indicates effect size of  $\pm 0.8$ .
